# Supplementary material for: Assessment of the Accuracy of Using ICD-9 Diagnosis Codes to Identify Pneumonia Etiology in Patients Hospitalized With Pneumonia
Source: PubMed Central journal article supplement (PMC7376393; doi:10.1001/jamanetworkopen.2020.7750), 2020-07-22
Supplement: jamanetwopen-3-e207750-s001.pdf [file jamanetwopen-3-e207750-s001.pdf]

## Supplementary Online Content

Higgins TL, Deshpande A, Zilberberg MD, et al. Assessment of the accuracy of using *ICD-9* diagnosis codes to identify pneumonia etiology in patients hospitalized with pneumonia. *JAMA Netw Open*. 2020;3(7):e207750. doi:10.1001/jamanetworkopen.2020.7750

**eFigure.** Venn Diagram of Etiology and Laboratory Result

**eTable.** Tests Required for Study Inclusion

This supplementary material has been provided by the authors to give readers additional information about their work.

eFigure. Venn Diagram of Etiology and Laboratory Result

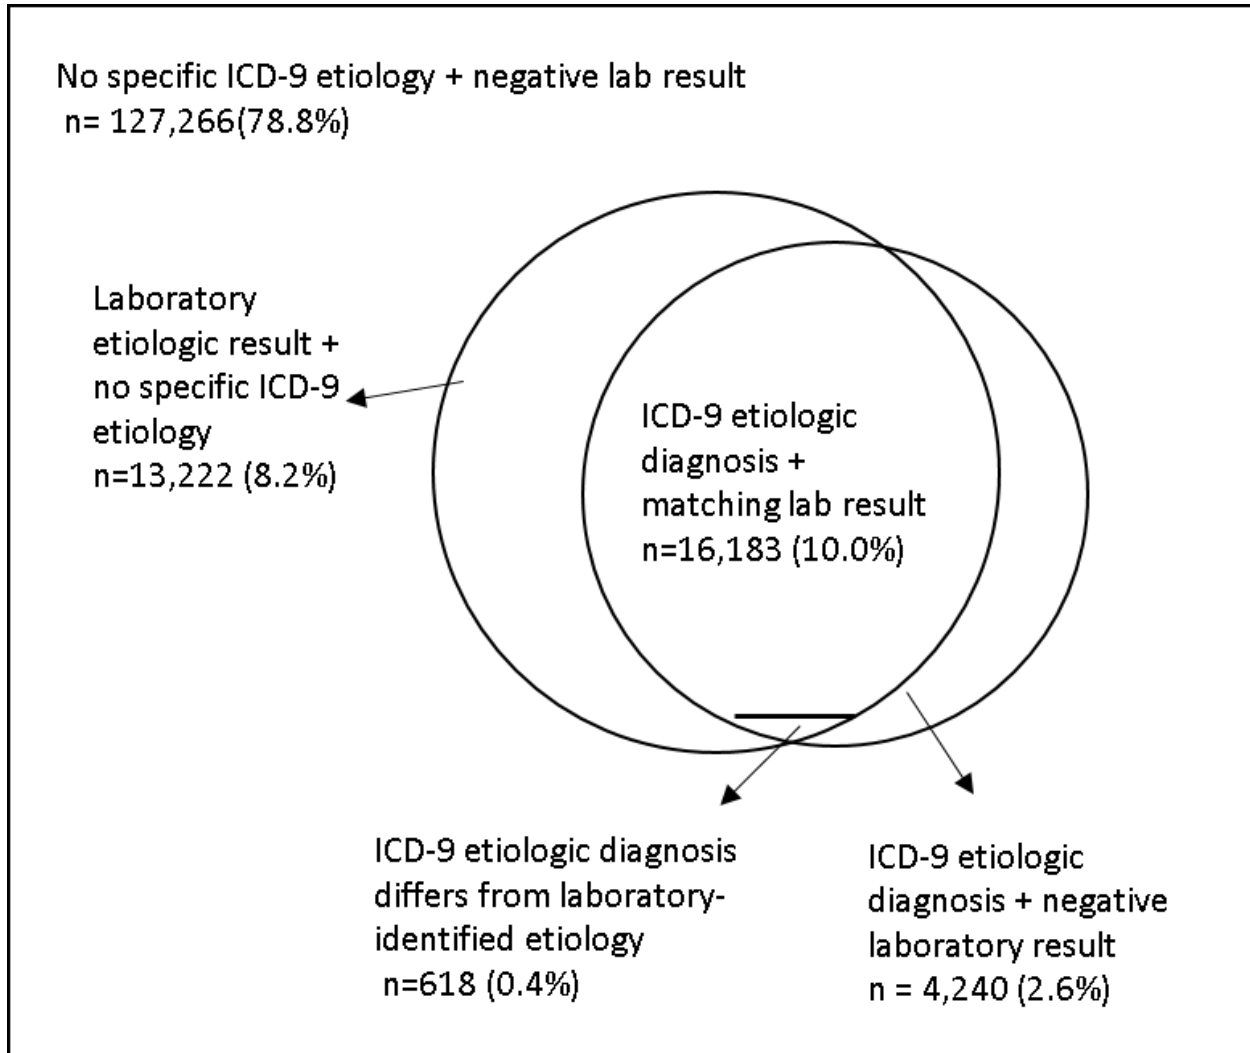

eTable. Tests Required for Study Inclusion

| <b>Factor</b>                                                               | <b>Total<br/>(N=161,529)</b> |
|-----------------------------------------------------------------------------|------------------------------|
| dx_486only, No. (%)                                                         | 107,601(66.6)                |
| 480.0: Pneumonia due to adenovirus, No. (%)                                 | 4(0.00)                      |
| 480.1: Pneumonia due to respiratory syncytial virus, No. (%)                | 61(0.04)                     |
| 480.2: Pneumonia due to parainfluenza virus, No. (%)                        | 35(0.02)                     |
| 480.3: Pneumonia due to SARS-associated coronavirus, No. (%)                | 1(0.00)                      |
| 480.8: Pneumonia due to other virus not elsewhere classified, No. (%)       | 130(0.08)                    |
| 480.9: Viral pneumonia, unspecified, No. (%)                                | 243(0.15)                    |
| 481: Pneumococcal pneumonia, No. (%)                                        | 4,090(2.5)                   |
| 482.0: Pneumonia due to Klebsiella pneumoniae, No. (%)                      | 979(0.61)                    |
| 482.1: Pneumonia due to Pseudomonas, No. (%)                                | 2,557(1.6)                   |
| 482.2: Pneumonia due to Hemophilus influenzae, No. (%)                      | 836(0.52)                    |
| 482.30: Pneumonia due to Streptococcus, unspecified, No. (%)                | 729(0.45)                    |
| 482.31: Pneumonia due to Streptococcus, group A, No. (%)                    | 96(0.06)                     |
| 482.32: Pneumonia due to Streptococcus, group B, No. (%)                    | 142(0.09)                    |
| 482.39: Pneumonia due to other Streptococcus, No. (%)                       | 268(0.17)                    |
| 482.40: Pneumonia due to Staphylococcus, unspecified, No. (%)               | 176(0.11)                    |
| 482.41: Methicillin susceptible pneumonia - Staphylococcus aureus, No. (%)  | 1,353(0.84)                  |
| 482.42: Methicillin resistant pneumonia - Staphylococcus aureus, No. (%)    | 3,747(2.3)                   |
| 482.49: Other Staphylococcus pneumonia, No. (%)                             | 87(0.05)                     |
| 482.81: Pneumonia due to anaerobes, No. (%)                                 | 89(0.06)                     |
| 482.82: Pneumonia due to escherichia coli, No. (%)                          | 628(0.39)                    |
| 482.83: Pneumonia due to other gram-negative bacteria, No. (%)              | 3,352(2.1)                   |
| 482.84: Pneumonia due to Legionnaires disease, No. (%)                      | 589(0.36)                    |
| 482.89: Pneumonia due to other specified bacteria, No. (%)                  | 97(0.06)                     |
| 482.9: Bacterial pneumonia, unspecified, No. (%)                            | 3,792(2.3)                   |
| 483.0: Pneumonia due to mycoplasma pneumoniae, No. (%)                      | 912(0.56)                    |
| 483.1: Pneumonia due to chlamydia, No. (%)                                  | 22(0.01)                     |
| 483.8: Pneumonia due to other specified organism, No. (%)                   | 162(0.10)                    |
| 484.1: Pneumonia in cytomegalic inclusion disease, No. (%)                  | 16(0.01)                     |
| 484.3: Pneumonia in whooping cough, No. (%)                                 | 3(0.00)                      |
| 484.5: Pneumonia in anthrax, No. (%)                                        | 0(0.0)                       |
| 484.6: Pneumonia in aspergillosis, No. (%)                                  | 96(0.06)                     |
| 484.7: Pneumonia in other systemic mycoses, No. (%)                         | 42(0.03)                     |
| 484.8: Pneumonia in other infectious diseases classified elsewhere, No. (%) | 12(0.01)                     |
| 485: Bronchopneumonia, organism unspecified, No. (%)                        | 728(0.45)                    |
| 486: Pneumonia, organism unspecified, No. (%)                               | 110,360(68.3)                |
| Pneumonia due to influenza (487.x 488.x), No. (%)                           | 5,891(3.6)                   |
| 487.0: Influenza with pneumonia, No. (%)                                    | 3,670(2.3)                   |
| 487.1: Influenza with other respiratory manifestations, No. (%)             | 976(0.60)                    |
| 487.8: Influenza with other manifestations, No. (%)                         | 118(0.07)                    |

|                                                                                                          |              |
|----------------------------------------------------------------------------------------------------------|--------------|
| 488.01: Influenza due to identified avian influenza virus with pneumonia, No. (%)                        | 64(0.04)     |
| 488.02: Influenza due to identified avian influenza virus with other respiratory manifestations, No. (%) | 111(0.07)    |
| 488.09: Influenza due to identified avian influenza virus with other manifestations, No. (%)             | 9(0.01)      |
| 488.11: Influenza due to identified 2009 H1N1 influenza virus with pneumonia, No. (%)                    | 177(0.11)    |
| 488.12: Influenza due to identified 2009 H1N1 influenza virus respiratory manifestations, No. (%)        | 100(0.06)    |
| 488.19: Influenza due to identified 2009 H1N1 influenza virus with other manifestations, No. (%)         | 10(0.01)     |
| 488.81: Influenza due to identified novel influenza A virus with pneumonia, No. (%)                      | 299(0.19)    |
| 488.82: Influenza due to identified novel influenza A virus respiratory manifestations, No. (%)          | 421(0.26)    |
| 488.89: Influenza due to identified novel influenza A virus with other manifestations, No. (%)           | 45(0.03)     |
| 507.0: Pneumonitis due to inhalation of food or vomitus, No. (%)                                         | 27,306(16.9) |

---
